# Supplementary material for: High diastereoselectivity in borohydride reductions of coordinated imines
Source: Royal Society of Chemistry journal article supplement (doi:10.1039/c1dt11704a), 2011-12-07
Supplement: c1dt11704a.pdf [file c1dt11704a.pdf]

# High Diastereoselectivity in Borohydride Reductions of Coordinated Imines

Sarah M. Wilson-Coutts<sup>a</sup>, Julian M. W. Browne<sup>a</sup>, Liesl C. Marsh<sup>a</sup>, Matthew I. J. Polson<sup>a</sup> and Richard M. Hartshorn<sup>\*a</sup>

<sup>5</sup> Received (in XXX, XXX) Xth XXXXXXXXXX 200X, Accepted Xth XXXXXXXXXX 200X

First published on the web Xth XXXXXXXXXX 200X

DOI: 10.1039/b000000x

## ESI Figures

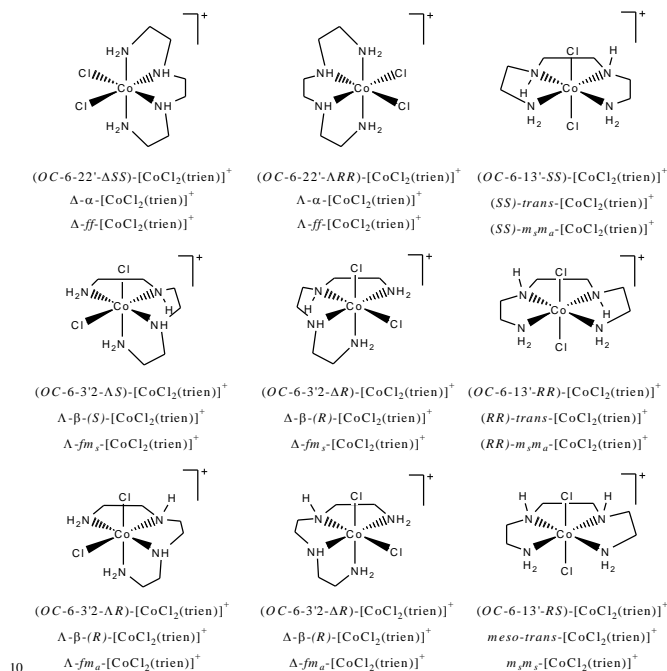

Figure S1: The nine stereoisomers of  $[\text{Co}(\text{trien})\text{Cl}_2]^+$ . Isomers are labelled using IUPAC configuration indices (top), the classical  $\alpha/\beta$  system, and the segment approach (see R. M. Hartshorn and D. A. House, *J. Chem. Soc., Dalton Trans.*, 1998, 2577).

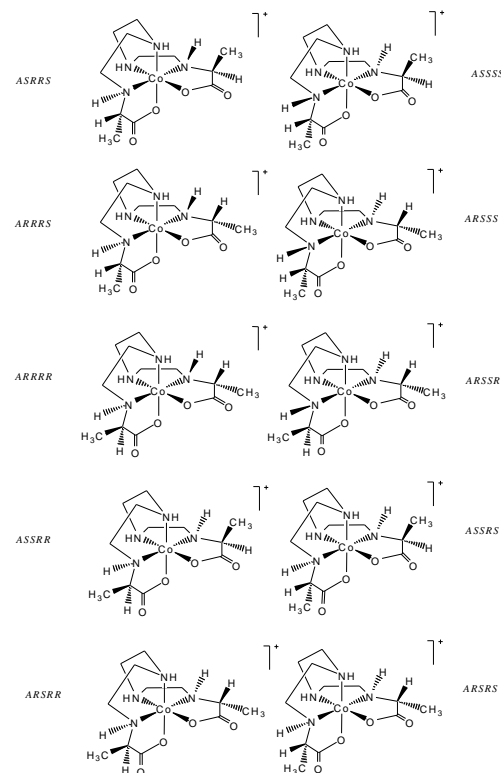

20

Figure S2: Ten of the 20 stereoisomers formed from the reduction reaction. The remaining ten stereoisomers are each an enantiomer of one of those shown. The configurations of stereogenic centres are indicated in the following order: cobalt (C/A), followed by  $\alpha$ -C-H, NH, NH,  $\alpha$ -C-H for the amino acid portions of the ligand, starting from the end of the ligand at the top or right of each drawn structure and working through the ligand

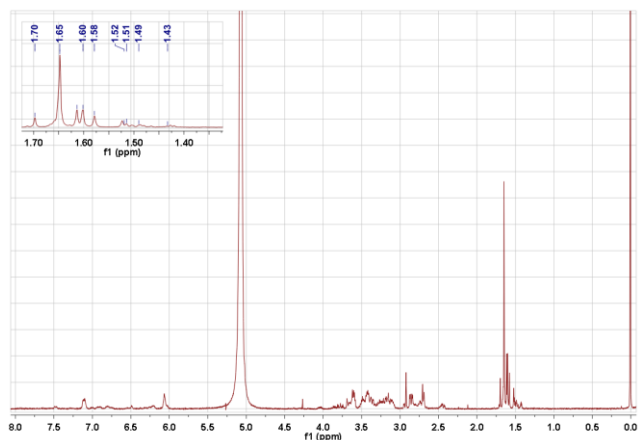

Figure S3  $^1\text{H}$  NMR spectrum of the crude reaction product from  $\text{NaBD}_4$  reduction.

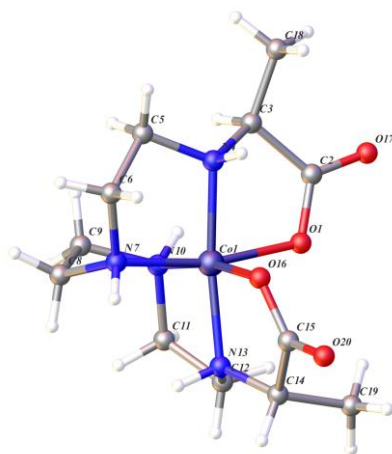

Figure S4: Complex 3, a minor isomer isolated from the reduction product. The configurations at Co1, C3, C14, and N4 are the same as those found in the major isomer. The configuration at N13 is opposite.

**Table S1** Crystallographic details for complex 3

|                                                   |                                                             |
|---------------------------------------------------|-------------------------------------------------------------|
| Empirical formula                                 | $\text{C}_{12}\text{H}_{26}\text{N}_4\text{O}_4\text{ClCo}$ |
| Formula weight                                    | 416.75                                                      |
| Temperature (K)                                   | 296(2)                                                      |
| Wavelength                                        | 0.71073                                                     |
| Crystal system                                    | Monoclinic                                                  |
| Space group                                       | $\text{P}2_1/\text{n}$                                      |
| Unit cell dimensions:                             |                                                             |
| a(Å)                                              | 7.5702(12)                                                  |
| b(Å)                                              | 21.160(3)                                                   |
| c(Å)                                              | 12.3205(19)                                                 |
| $\alpha$ (°)                                      | 90                                                          |
| $\beta$ (°)                                       | 96.930(8)                                                   |
| $\gamma$ (°)                                      | 90                                                          |
| Volume (Å <sup>3</sup> )                          | 1959.1(5)                                                   |
| Z                                                 | 4                                                           |
| Density (calculated) $\text{Mg/m}^3$              | 1.413                                                       |
| Absorption coefficient $\text{mm}^{-1}$           | 1.044                                                       |
| F(000)                                            | 872                                                         |
| Crystal size $\text{mm}^3$                        | $0.36 \times 0.28 \times 0.04$                              |
| Theta range for data collection (°)               | 1.92 to 24.99                                               |
| Reflections collected                             | 36332                                                       |
| Independent reflections [R(int)]                  | 3430 [0.1258]                                               |
| Completeness to theta = 25.05° (%)                | 0.999                                                       |
| Data / restraints / parameters                    | 3430 / 0 / 246                                              |
| Goodness-of-fit on $\text{F}^2$                   | 1.083                                                       |
| Final $R_1$ indices [I>2sigma(I)]                 | 0.1203                                                      |
| w $R_2$ (all data)                                | 0.3425                                                      |
| Largest diff. peak and hole ( $\text{e.Å}^{-3}$ ) | 1.843 and -1.286                                            |

## Notes

<sup>a</sup> Department of Chemistry, University of Canterbury, Private Bag 4800 Christchurch 8140, New Zealand. Fax: +64 3 364 2110; Tel: +64 3 364 2874; E-mail: richard.hartshorn@canterbury.ac.nz
